# Supplementary material
Source: Springer Nature journal article supplement (https://www.springermedizin.de/resource/supplementary/12936_2013_2926_MOESM4_ESM.pdf/9544634)

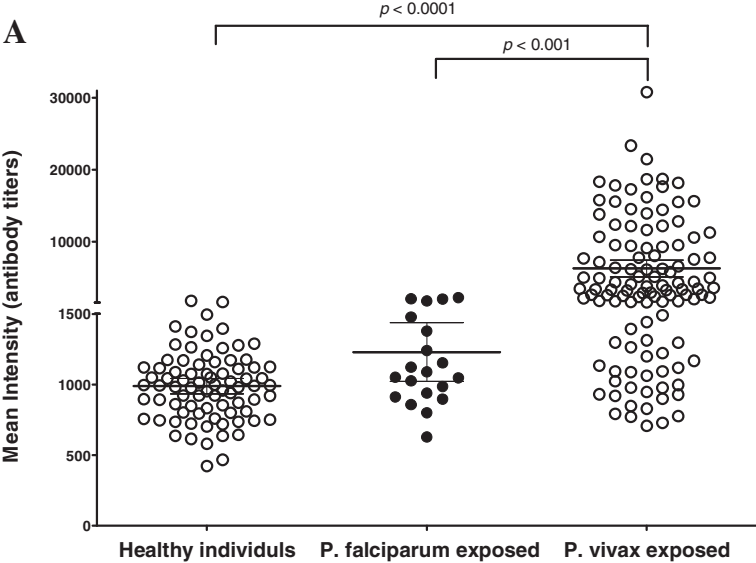

$r = 0.206, p = 0.156$

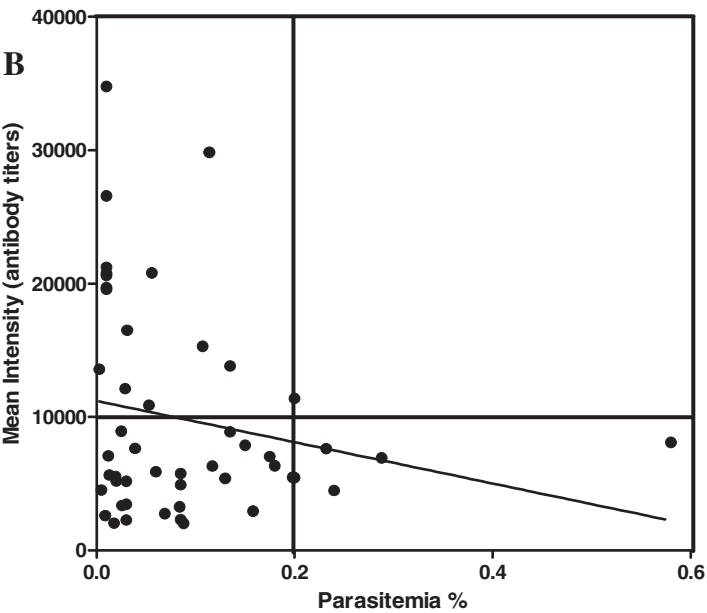

Supplement: MOESM4 [file 9544634]
